# Supplementary material
Source: PubMed Central journal article supplement (PMC11526806)
Supplement: NIHMS2025664-supplement-File_S1_-_Injection_apparatus_drawings.pdf [file NIHMS2025664-supplement-File_S1_-_Injection_apparatus_drawings.pdf]

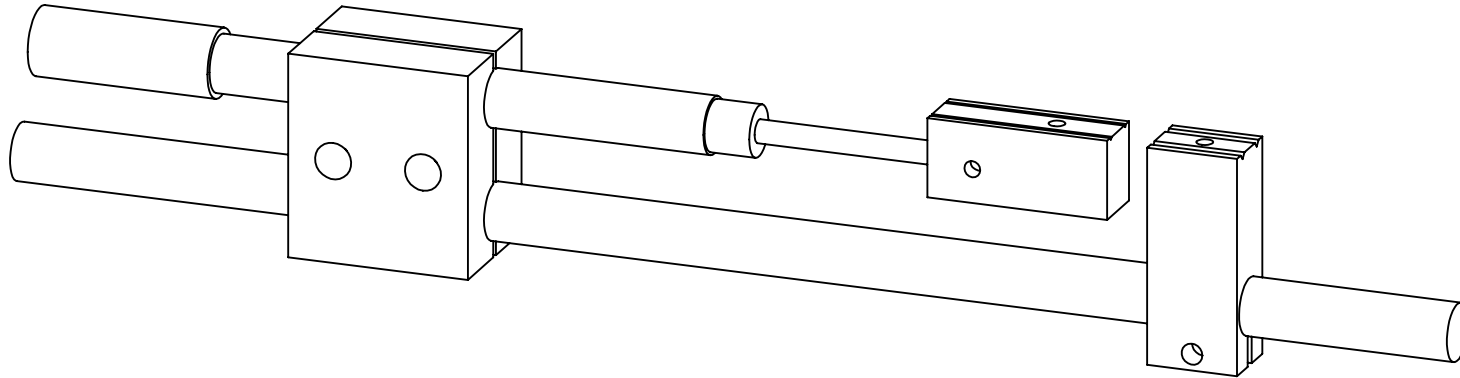

**PROPRIETARY AND CONFIDENTIAL**  
 THE INFORMATION CONTAINED IN THIS DRAWING IS THE PROPERTY OF <INSERT COMPANY NAME HERE>. ANY REPRODUCTION OR TRANSMISSION OF THIS DRAWING WITHOUT THE WRITTEN PERMISSION OF <INSERT COMPANY NAME HERE> IS PROHIBITED.

**SOLIDWORKS Educational Edition.**  
**For Instructional Use Only.**

|  |  |                                      |                      |            |      |            |                |
|--|--|--------------------------------------|----------------------|------------|------|------------|----------------|
|  |  | UNLESS OTHERWISE SPECIFIED:          |                      | NAME       | DATE |            |                |
|  |  | DIMENSIONS ARE IN INCHES             | DRAWN                | A. GALLANT |      | TITLE:     |                |
|  |  | TOLERANCES:                          | CHECKED              |            |      |            |                |
|  |  | FRACTIONAL ±                         | ENG APPR.            |            |      |            |                |
|  |  | ANGULAR: MACH ± BEND ±               | MFG APPR.            |            |      |            |                |
|  |  | TWO PLACE DECIMAL ±                  | Q.A.                 |            |      | SIZE       | DWG. NO.       |
|  |  | THREE PLACE DECIMAL ±                | COMMENTS:            |            |      | <b>A</b>   | SYRINGE HOLDER |
|  |  | INTERPRET GEOMETRIC TOLERANCING PER: |                      |            |      |            | REV            |
|  |  | MATERIAL                             |                      |            |      |            |                |
|  |  | FINISH                               |                      |            |      | SCALE: 1:1 | WEIGHT:        |
|  |  | USED ON                              |                      |            |      |            | SHEET 1 OF 5   |
|  |  | APPLICATION                          | DO NOT SCALE DRAWING |            |      |            |                |

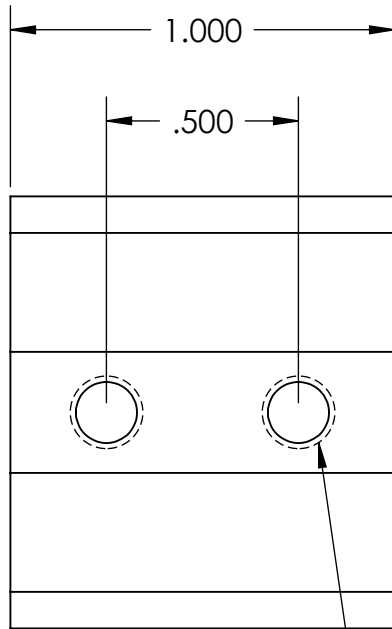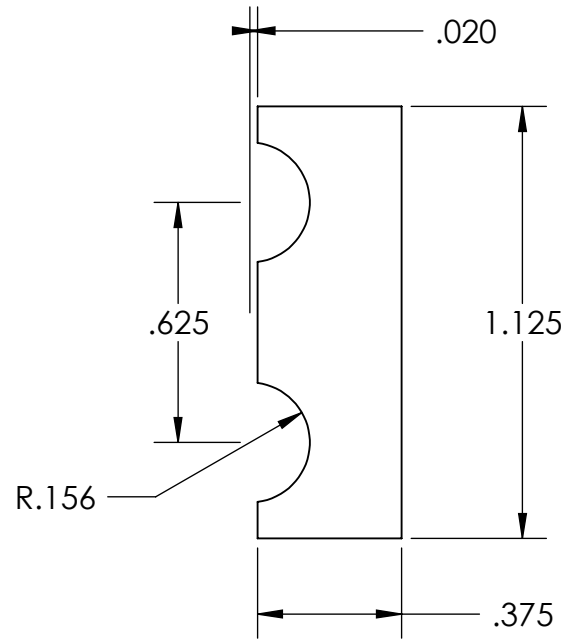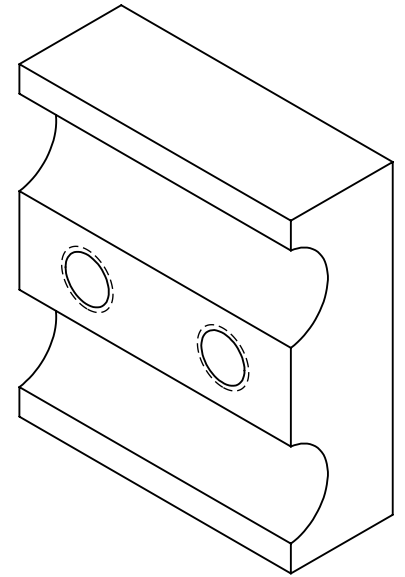

10-32 TAP THRU  
TYP. 2 PLS.

**PROPRIETARY AND CONFIDENTIAL**  
THE INFORMATION CONTAINED IN THIS DRAWING IS THE PROPERTY OF <INSERT COMPANY NAME HERE>. ANY REPRODUCTION OR TRANSMISSION OF THIS DRAWING WITHOUT THE WRITTEN PERMISSION OF <INSERT COMPANY NAME HERE> IS PROHIBITED.

**SOLIDWORKS Educational Edition.**  
**For Instructional Use Only.**

|             |  |                                      |           |            |            |              |
|-------------|--|--------------------------------------|-----------|------------|------------|--------------|
|             |  | UNLESS OTHERWISE SPECIFIED:          | NAME      | DATE       |            |              |
|             |  | DIMENSIONS ARE IN INCHES             | DRAWN     | A. GALLANT |            |              |
|             |  | TOLERANCES:                          | CHECKED   |            | TITLE:     |              |
|             |  | FRACTIONAL ±                         | ENG APPR. |            |            |              |
|             |  | ANGULAR: MACH ± BEND ±               | MFG APPR. |            |            |              |
|             |  | TWO PLACE DECIMAL ±                  | Q.A.      |            |            |              |
|             |  | THREE PLACE DECIMAL ±                | COMMENTS: |            |            |              |
|             |  | INTERPRET GEOMETRIC TOLERANCING PER: |           |            | SIZE       | DWG. NO.     |
|             |  | MATERIAL                             |           |            | <b>A</b>   | MAIN CLAMP 1 |
|             |  | BLACK DELRIN                         |           |            |            | REV          |
|             |  | FINISH                               |           |            | SCALE: 2:1 | WEIGHT:      |
|             |  | USED ON                              |           |            |            | SHEET 2 OF 5 |
| APPLICATION |  | DO NOT SCALE DRAWING                 |           |            |            |              |

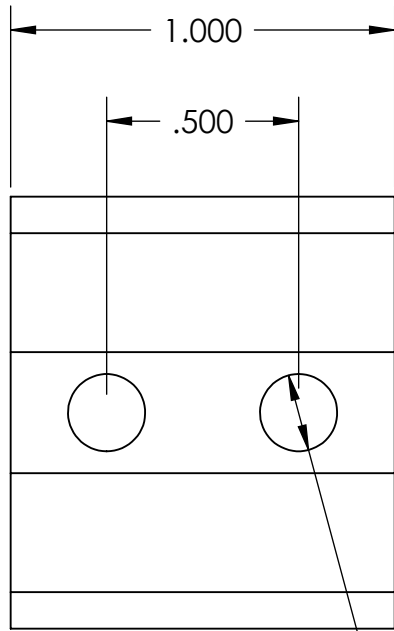

Ø .201 THRU  
TYP. 2 PLS.

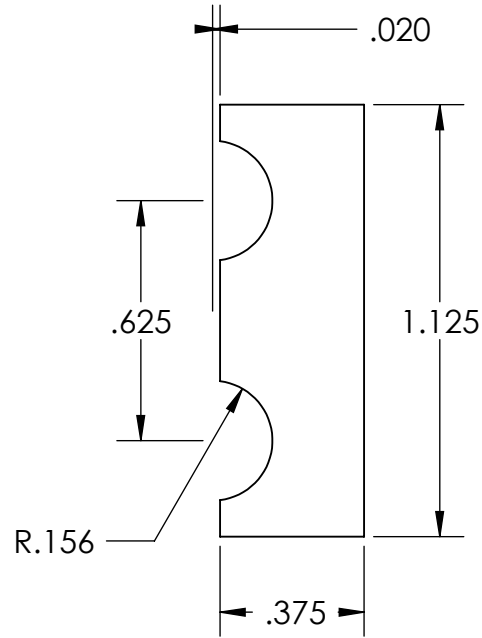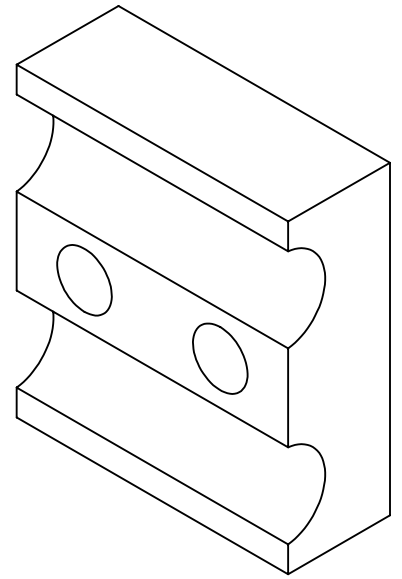

**PROPRIETARY AND CONFIDENTIAL**  
 THE INFORMATION CONTAINED IN THIS DRAWING IS THE PROPERTY OF <INSERT COMPANY NAME HERE>. ANY REPRODUCTION OR TRANSMISSION OF THIS DRAWING WITHOUT THE WRITTEN PERMISSION OF <INSERT COMPANY NAME HERE> IS PROHIBITED.

**SOLIDWORKS Educational Edition.**  
**For Instructional Use Only.**

|  |             |                                      |           |            |      |              |
|--|-------------|--------------------------------------|-----------|------------|------|--------------|
|  |             | UNLESS OTHERWISE SPECIFIED:          |           | NAME       | DATE |              |
|  |             | DIMENSIONS ARE IN INCHES             | DRAWN     | A. GALLANT |      | TITLE:       |
|  |             | TOLERANCES:                          | CHECKED   |            |      |              |
|  |             | FRACTIONAL ±                         | ENG APPR. |            |      |              |
|  |             | ANGULAR: MACH ± BEND ±               | MFG APPR. |            |      |              |
|  |             | TWO PLACE DECIMAL ±                  | Q.A.      |            |      |              |
|  |             | THREE PLACE DECIMAL ±                | COMMENTS: |            |      |              |
|  |             | INTERPRET GEOMETRIC TOLERANCING PER: |           |            |      | SIZE         |
|  |             | MATERIAL                             |           |            |      | DWG. NO.     |
|  |             | BLACK DELRIN                         |           |            |      | MAIN CLAMP 2 |
|  |             | FINISH                               |           |            |      | REV          |
|  |             | USED ON                              |           |            |      |              |
|  | APPLICATION | DO NOT SCALE DRAWING                 |           |            |      | SCALE: 2:1   |
|  |             |                                      |           |            |      | WEIGHT:      |
|  |             |                                      |           |            |      | SHEET 3 OF 5 |

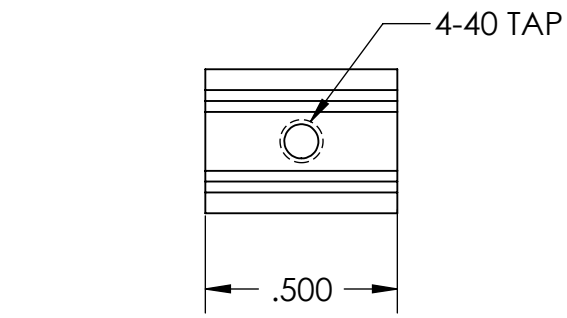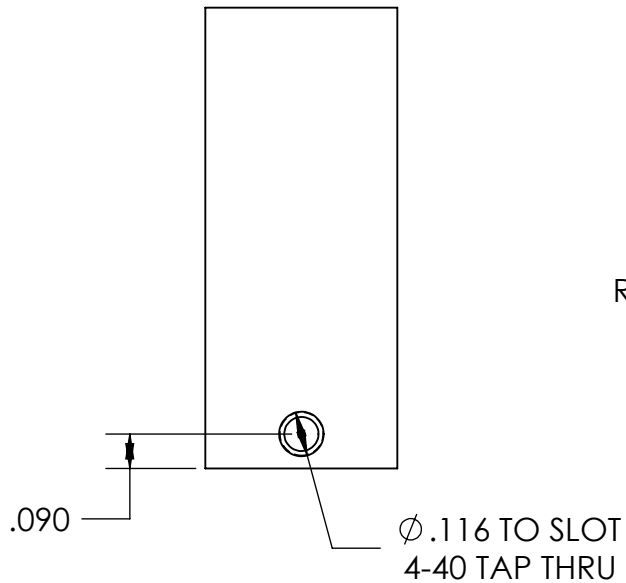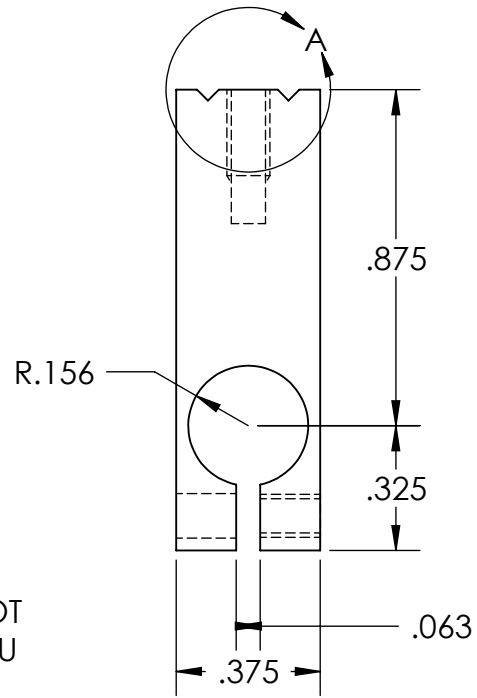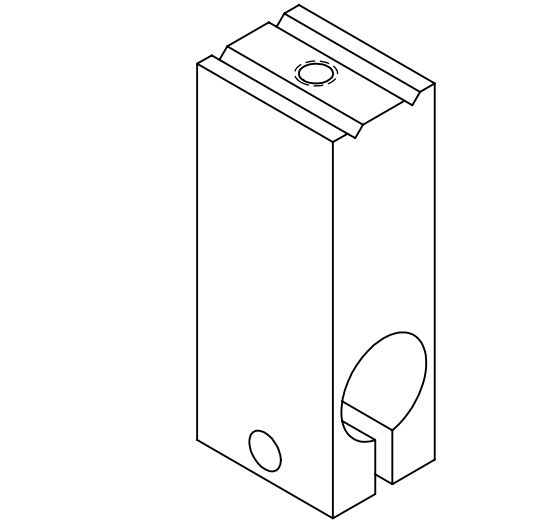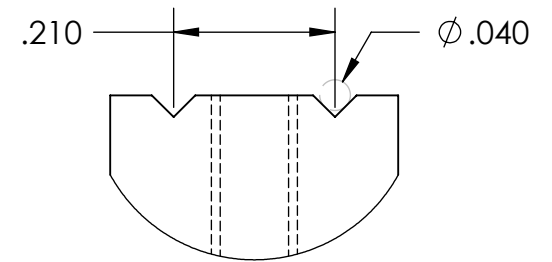

DETAIL A  
SCALE 4 : 1

**PROPRIETARY AND CONFIDENTIAL**  
 THE INFORMATION CONTAINED IN THIS DRAWING IS THE PROPERTY OF <INSERT COMPANY NAME HERE>. ANY REPRODUCTION OR TRANSMISSION OF THIS DRAWING WITHOUT THE WRITTEN PERMISSION OF <INSERT COMPANY NAME HERE> IS PROHIBITED.

**SOLIDWORKS Educational Edition.**  
 For Instructional Use Only.

|  |             |                                                                                                                                                       |            |                |              |        |
|--|-------------|-------------------------------------------------------------------------------------------------------------------------------------------------------|------------|----------------|--------------|--------|
|  |             | UNLESS OTHERWISE SPECIFIED:                                                                                                                           |            | NAME           | DATE         |        |
|  |             | DIMENSIONS ARE IN INCHES<br>TOLERANCES:<br>FRACTIONAL $\pm$<br>ANGULAR: MACH $\pm$ BEND $\pm$<br>TWO PLACE DECIMAL $\pm$<br>THREE PLACE DECIMAL $\pm$ | DRAWN      | A. GALLANT     |              | TITLE: |
|  |             | INTERPRET GEOMETRIC<br>TOLERANCING PER:                                                                                                               | CHECKED    |                |              |        |
|  |             | MATERIAL<br>BLACK DELRIN                                                                                                                              | ENG APPR.  |                |              |        |
|  |             | FINISH                                                                                                                                                | MFG APPR.  |                |              |        |
|  | USED ON     |                                                                                                                                                       | Q.A.       |                |              |        |
|  | APPLICATION | DO NOT SCALE DRAWING                                                                                                                                  | COMMENTS:  |                |              |        |
|  |             |                                                                                                                                                       | SIZE       | DWG. NO.       | REV          |        |
|  |             |                                                                                                                                                       | <b>A</b>   | PIPETTE HOLDER |              |        |
|  |             |                                                                                                                                                       | SCALE: 2:1 | WEIGHT:        | SHEET 4 OF 5 |        |

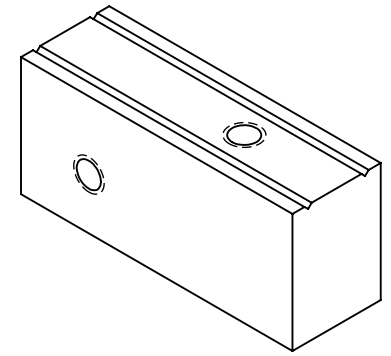

4-40 TAP THRU  
TYP. 2 PLS.

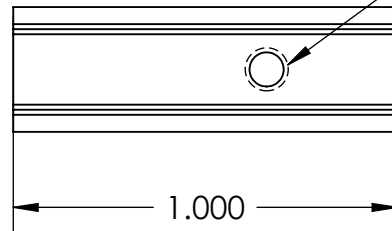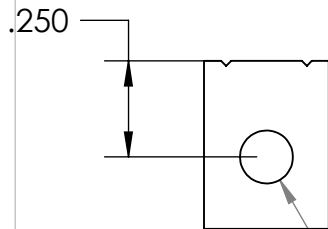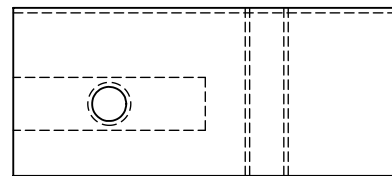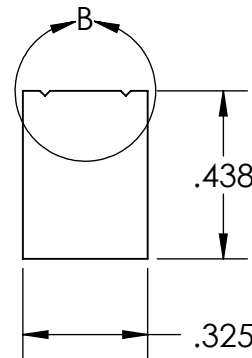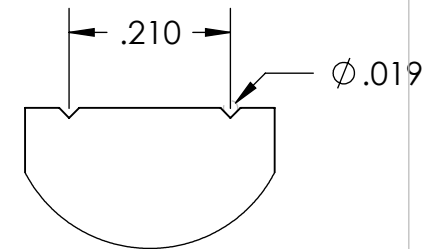

Ø.138  $\nabla$  .500  
S.F. FOR 3.5MM SHAFT

DETAIL B  
SCALE 4 : 1

PROPRIETARY AND CONFIDENTIAL

SOLIDWORKS Educational Edition.  
For Instructional Use Only.

THE INFORMATION CONTAINED IN THIS DRAWING IS THE PROPERTY OF <INSERT COMPANY NAME HERE>. ANY REPRODUCTION OR TRANSMISSION OF THIS DRAWING WITHOUT THE WRITTEN PERMISSION OF <INSERT COMPANY NAME HERE> IS PROHIBITED.

|             |         |                                                                                                                                                       |           |            |      |                                                                              |
|-------------|---------|-------------------------------------------------------------------------------------------------------------------------------------------------------|-----------|------------|------|------------------------------------------------------------------------------|
|             |         | UNLESS OTHERWISE SPECIFIED:                                                                                                                           |           | NAME       | DATE |                                                                              |
|             |         | DIMENSIONS ARE IN INCHES<br>TOLERANCES:<br>FRACTIONAL $\pm$<br>ANGULAR: MACH $\pm$ BEND $\pm$<br>TWO PLACE DECIMAL $\pm$<br>THREE PLACE DECIMAL $\pm$ | DRAWN     | A. GALLANT |      | TITLE:                                                                       |
|             |         | INTERPRET GEOMETRIC<br>TOLERANCING PER:                                                                                                               | CHECKED   |            |      |                                                                              |
|             |         | MATERIAL<br>BLACK DELRIN                                                                                                                              | ENG APPR. |            |      |                                                                              |
|             |         | FINISH                                                                                                                                                | MFG APPR. |            |      |                                                                              |
|             | USED ON |                                                                                                                                                       | Q.A.      |            |      | SIZE <b>A</b> DWG. NO. PLUNGER HOLDER REV<br>SCALE: 2:1 WEIGHT: SHEET 5 OF 5 |
| APPLICATION |         | DO NOT SCALE DRAWING                                                                                                                                  | COMMENTS: |            |      |                                                                              |
